# Supplementary material
Source: publisher figshare collection journal article supplement (https://acs.figshare.com/ndownloader/files/15203003)
Supplement: Supplementary file 1 [file 15203003]

## Supporting Information

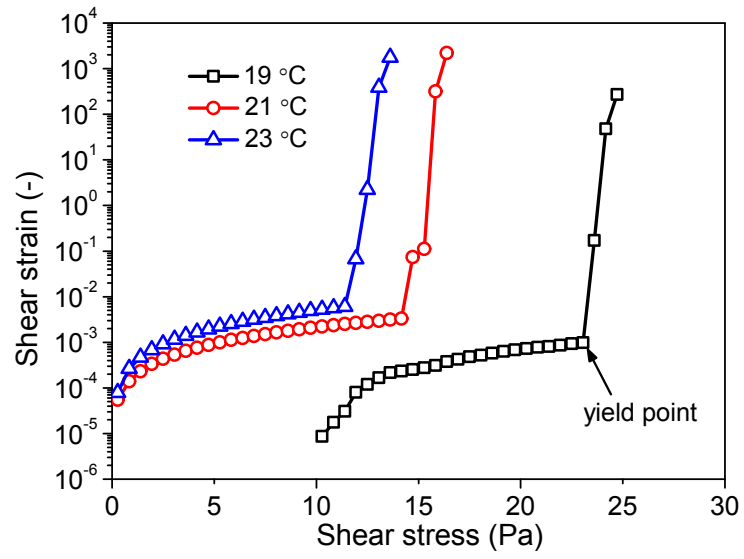

**Figure S1.** Evolution of the shear strain with the shear stress and the yield point of the waxy crude oil without scCO<sub>2</sub> treatment.

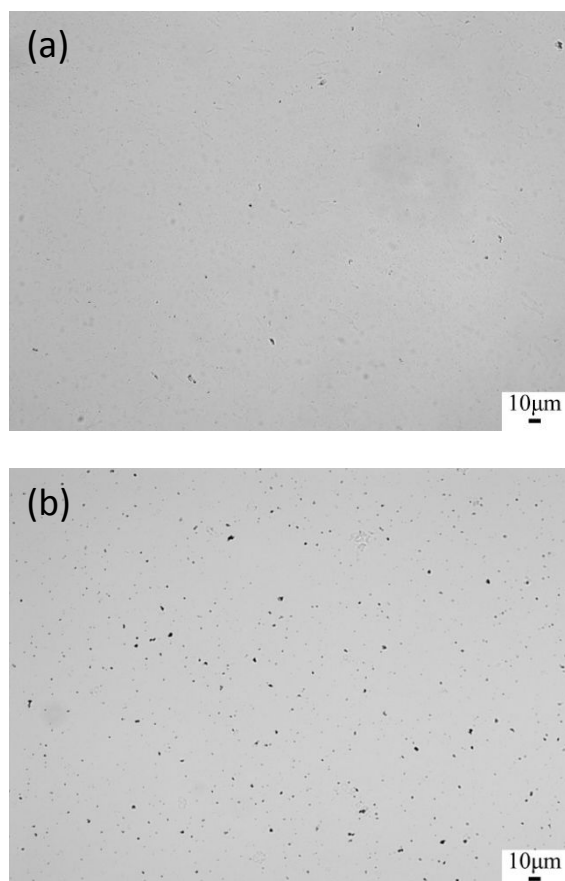

**Figure S2.** Morphology of asphaltene particles in the crude oils with and without  $\text{scCO}_2$  treatment: (a) untreated, 50 °C; (b) treated, 50 °C.
